# Supplementary material for: The Neurobiological Basis of Cognitive Side Effects of Electroconvulsive Therapy: A Systematic Review
Source: MDPI journal article supplement (doi:10.3390/brainsci11101273), 2021-09-26
Supplement: s1 [file s1]

**Supplementary Materials:** The following are available online at <https://www.mdpi.com/article/10.3390/brainsci11101273/s1>.

### Quality Assessment Index

To evaluate the relevance of each article reviewed for our main objectives we use a quality index for each study. A quality index was calculated as the average score of all items bellow-described and to avoid lack of transparency we also provide the score of each item in Table S1.

1. Treatment group. (1 = Only patients with major depressive disorder (MDD) are evaluated; 0.5 = Other diagnoses are included but an additional analysis only with the subgroup of patients with MDD is presented; 0 = Other diagnoses are included, and no MDD-specific analysis is provided).
2. Healthy participants as a comparison group. (1 = Yes; 0.5 = Yes but with sociodemographic differences; 0 = No).
3. Sample size of patients with MDD (1=  $n > 10$ ; 0 =  $n \leq 10$ ).
4. Sex and age report. (1 = Complete; 0.5 = Incomplete; 0 = Not reported).
5. Cognitive scales used of the electroconvulsive therapy (ECT) group, including both baseline and post-ECT assessments. (1 = Complete; 0.5 = Incomplete; 0 = Not reported).
6. Description of the ECT protocol, including electrode placement, dosage method and anaesthetics used as well as number and frequency of ECT sessions. (1 = Complete; 0.5 = Incomplete; 0 = Not reported).
7. Study protocol. (1 = Longitudinal assessments before and after completion of an acute ECT course; 0.5 = Longitudinal assessments after completion of an acute ECT course; 0 = Only baseline measures).

| Study                       | Treatm<br>ent<br>group | Healthy<br>particip<br>ants | MDD<br>sample<br>sized<br>( $>10$ ) | Sex and<br>Age<br>reporte<br>d | Cogniti<br>ve<br>Measur<br>es | ECT<br>protocol<br>descript<br>ion | Study<br>protoco<br>l | TOTAL |
|-----------------------------|------------------------|-----------------------------|-------------------------------------|--------------------------------|-------------------------------|------------------------------------|-----------------------|-------|
| Agelink et al., 2001        | 0                      | 0                           | 1                                   | 1                              | 1                             | 0                                  | 1                     | 4     |
| Palmio et al., 2009         | 1                      | 0                           | 0                                   | 1                              | 1                             | 1                                  | 1                     | 5     |
| Kranaster et al., 2014      | 1                      | 0                           | 1                                   | 1                              | 1                             | 0,5                                | 1                     | 5.5   |
| Arts et al., 2006           | 1                      | 0                           | 1                                   | 1                              | 1                             | 1                                  | 1                     | 6     |
| Piccinni et al., 2013       | 1                      | 0                           | 1                                   | 1                              | 1                             | 1                                  | 1                     | 6     |
| Kranaster et al., 2016      | 1                      | 0                           | 1                                   | 1                              | 1                             | 1                                  | 1                     | 6     |
| Yamazaki et al., 2017       | 1                      | 1                           | 1                                   | 1                              | 1                             | 1                                  | 1                     | 7     |
| Bousman et al., 2015        | 1                      | 0                           | 1                                   | 1                              | 1                             | 1                                  | 0,5                   | 5.5   |
| Ryan et al., 2019           | 1                      | 1                           | 1                                   | 1                              | 1                             | 1                                  | 1                     | 7     |
| Neylan et al., 2001         | 1                      | 0                           | 1                                   | 1                              | 1                             | 1                                  | 0                     | 5     |
| Figiel et al., 1990         | 1                      | 0                           | 1                                   | 0                              | 1                             | 1                                  | 0,5                   | 4.5   |
| Oudega et al., 2015         | 1                      | 0                           | 1                                   | 1                              | 0,5                           | 1                                  | 0                     | 4.5   |
| Wagenmakers et al.,<br>2021 | 1                      | 0                           | 1                                   | 1                              | 1                             | 1                                  | 0                     | 5     |
| Diehl et al., 1993          | 1                      | 0                           | 0                                   | 1                              | 1                             | 1                                  | 1                     | 5     |
| Kunigiri et al., 2007       | 1                      | 0                           | 1                                   | 1                              | 1                             | 1                                  | 0,5                   | 5.5   |
| Gbyl et al., 2019           | 1                      | 0                           | 1                                   | 1                              | 1                             | 1                                  | 1                     | 6     |
| Xu et al., 2019             | 1                      | 0                           | 1                                   | 1                              | 1                             | 1                                  | 1                     | 6     |
| Lekwauwa et al., 2006       | 1                      | 0                           | 1                                   | 1                              | 1                             | 1                                  | 0,5                   | 5.5   |
| Nordanskog et al., 2014     | 1                      | 0                           | 1                                   | 1                              | 1                             | 1                                  | 1                     | 6     |

|                             |   |   |   |   |   |   |     |     |
|-----------------------------|---|---|---|---|---|---|-----|-----|
| Van Oostrom et al.,<br>2018 | 1 | 1 | 1 | 1 | 1 | 1 | 1   | 7   |
| Gbyl et al., 2020           | 1 | 0 | 1 | 1 | 1 | 1 | 1   | 6   |
| Abbot et al., 2014          | 1 | 0 | 1 | 1 | 1 | 1 | 0,5 | 5.5 |
| Bai et al., 2018            | 1 | 0 | 1 | 1 | 1 | 1 | 1   | 6   |
| Wang et al., 2019           | 1 | 0 | 1 | 1 | 1 | 1 | 1   | 6   |
| Wang et al., 2020           | 1 | 0 | 1 | 1 | 1 | 1 | 1   | 6   |
| Sinha et al., 2019          | 1 | 0 | 1 | 1 | 1 | 1 | 1   | 6   |
| Wei et al., 2019            | 1 | 1 | 1 | 1 | 1 | 1 | 1   | 7   |
| Wei et al., 2020            | 1 | 1 | 1 | 1 | 1 | 1 | 1   | 7   |

MDD, Major depressive disorder; ECT, Electroconvulsive therapy.
